# Supplementary material
Source: HighWire-hosted journal article supplement (https://bmjopen.bmj.com/content/11/1/e044017)
Supplement: inline-supplementary-material-1 [file inline-supplementary-material-1.pdf]

**Supplementary Table 1.** Multivariable model of the association between patient goals and abstinence from opioid use for 3 months following study entry including all covariates.

| Covariate                                                                                                                                                                                                                                                                                                                                                                                                                                                                                                                                                                                                                                               | <i>Complete case analysis<sup>a</sup></i><br>(n = 1,994 <sup>b</sup> ) |            |        | <i>Sensitivity analysis excluding outliers (n = 1,980)<sup>a,c</sup></i> |            |         |
|---------------------------------------------------------------------------------------------------------------------------------------------------------------------------------------------------------------------------------------------------------------------------------------------------------------------------------------------------------------------------------------------------------------------------------------------------------------------------------------------------------------------------------------------------------------------------------------------------------------------------------------------------------|------------------------------------------------------------------------|------------|--------|--------------------------------------------------------------------------|------------|---------|
|                                                                                                                                                                                                                                                                                                                                                                                                                                                                                                                                                                                                                                                         | OR                                                                     | 95% CI     | p      | OR                                                                       | 95% CI     | p       |
| Control cravings/withdrawal                                                                                                                                                                                                                                                                                                                                                                                                                                                                                                                                                                                                                             | 0.76                                                                   | 0.56, 1.03 | 0.078  | 0.73                                                                     | 0.54, 0.99 | 0.044   |
| Maintain or stabilize medication dose                                                                                                                                                                                                                                                                                                                                                                                                                                                                                                                                                                                                                   | 1.15                                                                   | 0.74, 1.79 | 0.523  | 1.24                                                                     | 0.79, 1.95 | 0.354   |
| “Live a normal life”                                                                                                                                                                                                                                                                                                                                                                                                                                                                                                                                                                                                                                    | 1.02                                                                   | 0.77, 1.35 | 0.879  | 0.98                                                                     | 0.74, 1.31 | 0.902   |
| Manage pain                                                                                                                                                                                                                                                                                                                                                                                                                                                                                                                                                                                                                                             | 1.0                                                                    | 0.73, 1.36 | 0.976  | 0.96                                                                     | 0.70, 1.32 | 0.806   |
| “Stay or get clean”                                                                                                                                                                                                                                                                                                                                                                                                                                                                                                                                                                                                                                     | 0.73                                                                   | 0.59, 0.91 | 0.005  | 0.70                                                                     | 0.56, 0.87 | 0.001   |
| Stop or taper off treatment                                                                                                                                                                                                                                                                                                                                                                                                                                                                                                                                                                                                                             | 1.0                                                                    | 0.80, 1.27 | 0.974  | 1.01                                                                     | 0.80, 1.27 | 0.954   |
| Age in years                                                                                                                                                                                                                                                                                                                                                                                                                                                                                                                                                                                                                                            | 1.0                                                                    | 0.99, 1.01 | 0.730  | 1.0                                                                      | 0.99, 1.01 | 0.715   |
| Female sex                                                                                                                                                                                                                                                                                                                                                                                                                                                                                                                                                                                                                                              | 1.13                                                                   | 0.93, 1.37 | 0.223  | 1.14                                                                     | 0.94, 1.39 | 0.194   |
| Type of treatment                                                                                                                                                                                                                                                                                                                                                                                                                                                                                                                                                                                                                                       |                                                                        |            |        |                                                                          |            |         |
| Methadone                                                                                                                                                                                                                                                                                                                                                                                                                                                                                                                                                                                                                                               | [ref]                                                                  |            |        | [ref]                                                                    |            |         |
| Buprenorphine-naloxone                                                                                                                                                                                                                                                                                                                                                                                                                                                                                                                                                                                                                                  | 1.88                                                                   | 1.40, 2.50 | < 0001 | 2.13                                                                     | 1.58, 2.86 | < 0.001 |
| Medication dose (mg/day)                                                                                                                                                                                                                                                                                                                                                                                                                                                                                                                                                                                                                                | 1.0                                                                    | 0.99, 1.01 | 0.057  | 1.0                                                                      | 1.0, 1.0   | 0.015   |
| Years in treatment                                                                                                                                                                                                                                                                                                                                                                                                                                                                                                                                                                                                                                      | 1.03                                                                   | 1.01, 1.04 | 0.013  | 1.03                                                                     | 1.01, 1.05 | 0.006   |
| Opioid abstinence at baseline                                                                                                                                                                                                                                                                                                                                                                                                                                                                                                                                                                                                                           | 5.34                                                                   | 4.23, 6.74 | <0.001 | 6.15                                                                     | 4.83, 7.84 | < 0.001 |
| OR = Odds Ratio, CI = Confidence Interval<br>Variance inflation factor = 1.19<br>Hosmer-Lemeshow $\chi^2$ 5.93, $p$ = 0.656<br><sup>a</sup> Model is adjusted for age, sex, type of treatment (methadone or buprenorphine-naloxone), dose, length of time in treatment, and opioid abstinence at baseline.<br><sup>b</sup> Participants with missing data in any of the included covariates are excluded due to complete case analysis (missing urine drug screen data: n = 36, missing sex: n = 1, missing length of time in treatment: n = 1).<br><sup>c</sup> Excluding 14 outliers detected using deviance residuals less than -2 from the analysis |                                                                        |            |        |                                                                          |            |         |
