# Supplementary material
Source: HighWire-hosted journal article supplement (https://bmjopen.bmj.com/content/11/1/e044017)
Supplement: inline-supplementary-material-2 [file inline-supplementary-material-2.pdf]

**Supplementary Table 2.** Multivariable model of the association between number of self-reported goals and abstinence from opioid use for 3 months following study entry.

| Covariate                                 | (n = 1,994 <sup>b</sup> ) |            |         |
|-------------------------------------------|---------------------------|------------|---------|
|                                           | OR                        | 95% CI     | p       |
| Number of goals reported                  |                           |            |         |
| One                                       | [ref]                     |            |         |
| Two                                       | 0.93                      | 0.75, 1.15 | 0.497   |
| Three or more                             | 0.70                      | 0.49, 1.0  | 0.049   |
| Age in years                              | 1.0                       | 0.99, 1.01 | 0.600   |
| Female sex                                | 1.14                      | 0.94, 1.38 | 0.197   |
| Type of treatment                         |                           |            |         |
| Methadone                                 | [ref]                     |            |         |
| Buprenorphine-naloxone                    | 1.88                      | 1.41, 2.52 | < 0.001 |
| Medication dose (mg/day)                  | 1.0                       | 0.99, 1.01 | 0.055   |
| Years in treatment                        | 1.03                      | 1.01, 1.05 | 0.004   |
| Opioid abstinence at baseline             | 5.41                      | 4.30, 6.82 | <0.001  |
| OR = Odds Ratio, CI = Confidence Interval |                           |            |         |
